# Supplementary material for: Seipin oligomers can interact directly with AGPAT2 and lipin 1, physically scaffolding critical regulators of adipogenesis
Source: PubMed Central journal article supplement (PMC4338318; doi:10.1016/j.molmet.2014.12.013), 2015-01-06

# Talukder Figure S1

## A

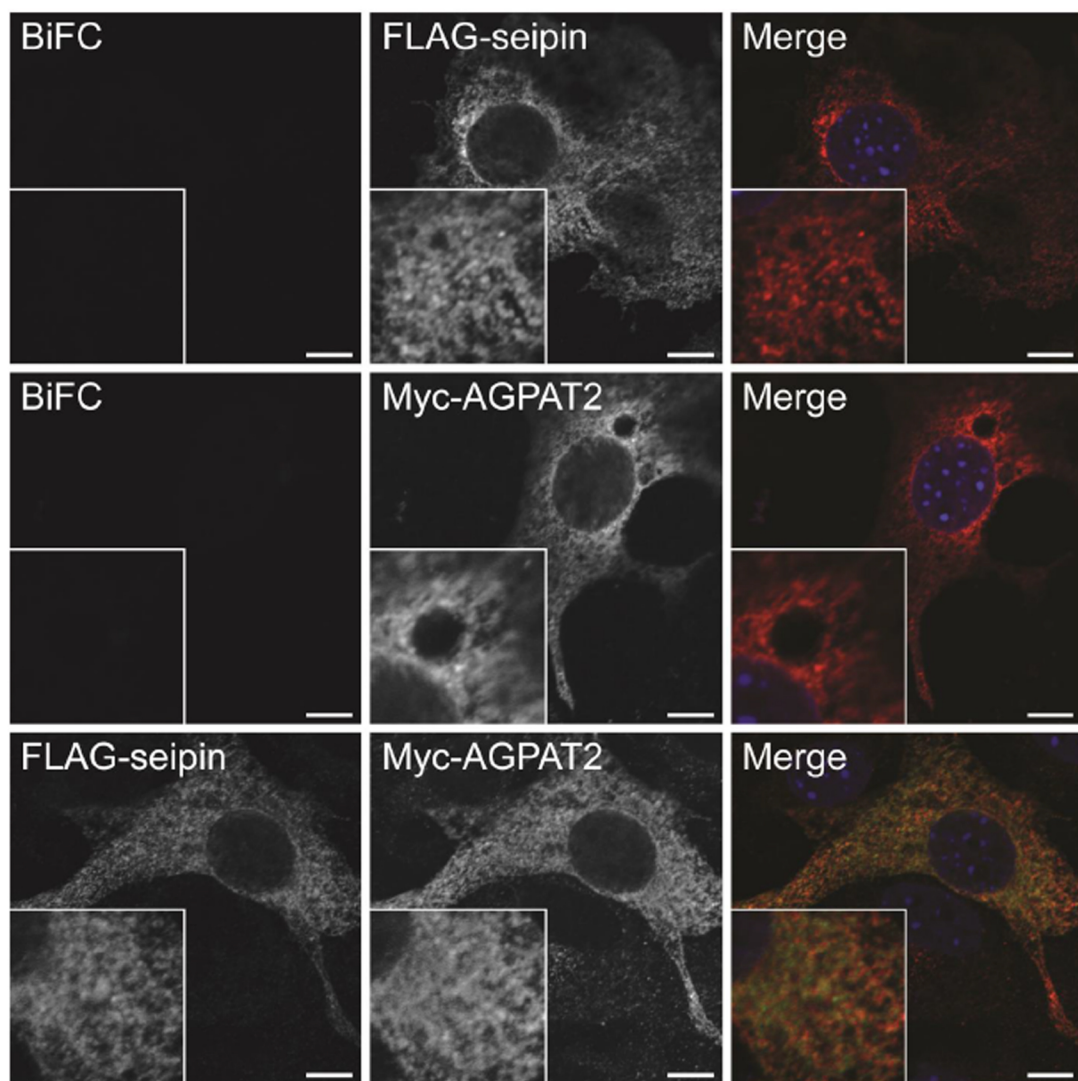

## B

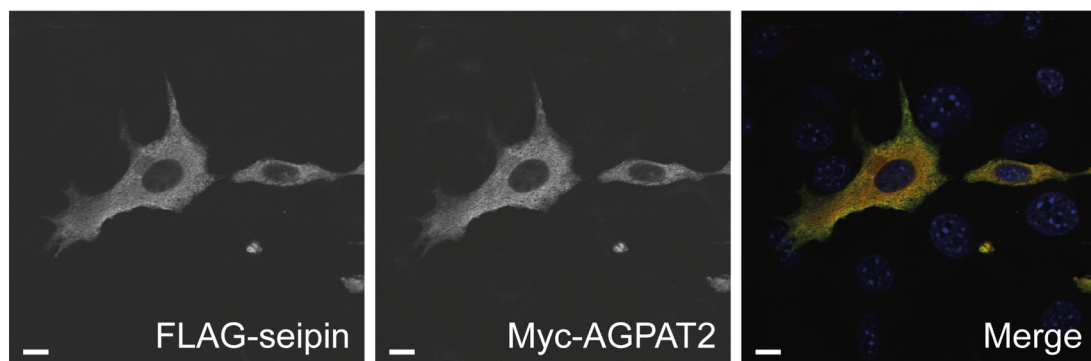

Supplement: mmc1.pdf [file mmc1.pdf]
